# Supplementary material for: AmiA is a penicillin target enzyme with dual activity in the intracellular pathogen Chlamydia pneumoniae
Source: PubMed Central journal article supplement — Nat Commun. 2014 Jun 23;5:4201. doi: 10.1038/ncomms5201 (PMC4083426; doi:10.1038/ncomms5201), 2014-06-23
Supplement: ncomms5201-s1.pdf [file ncomms5201-s1.pdf]

## Supplementary Figures

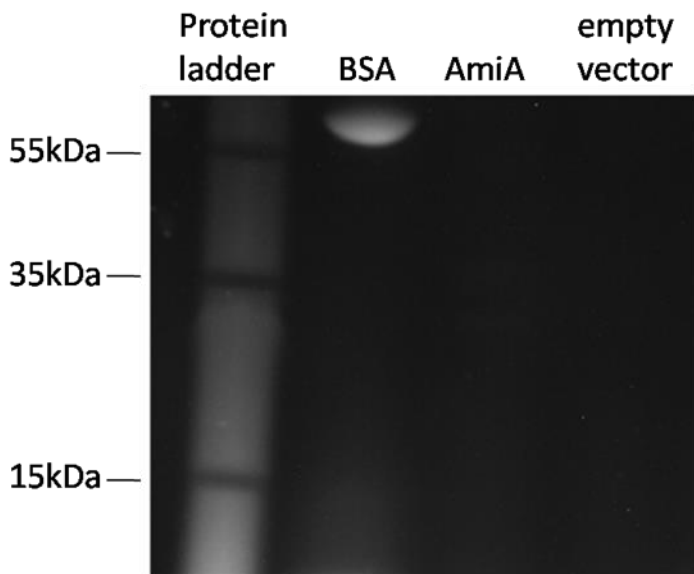

### Supplementary Figure 1

**Control for contaminating *E. coli* PBP DD-CPases in AmiA purifications.** Serum albumin is known to bind drugs such as beta-lactams<sup>1,2</sup> and served as a positive control for binding of bocillin FL (bovine serum albumin (BSA, 66.4kDa)).

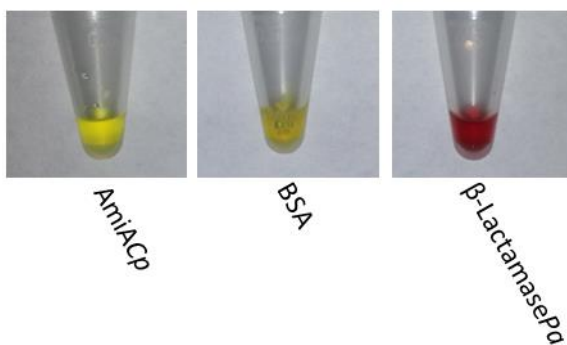

### Supplementary Figure 2

**Detection of beta-lactamase activity.** AmiACp did not show beta-lactamase activity in a nitrocefin hydrolysis assay. β-lactamasePa: beta-lactamase from *Pseudomonas aeruginosa* (Sigma Aldrich, Germany).

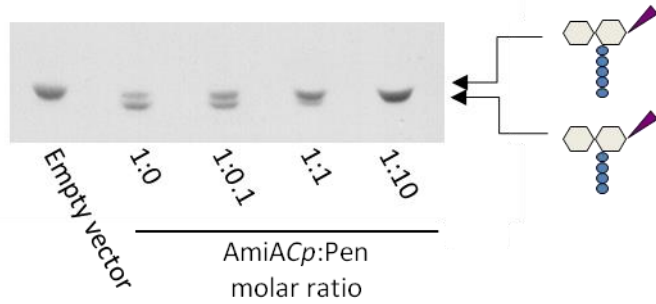

### Supplementary Figure 3

**Inhibition of AmiACp DD-CPase activity on lipid II by penicillin.** TLC analysis of DD-CPase reaction products after treatment with AmiACp in the presence of varying concentrations of penicillin (titration of protein:inhibitor molar ratios ranging from 1:0 to 1:10). DD-CPase activity was blocked in a molar ratio of 1:1.

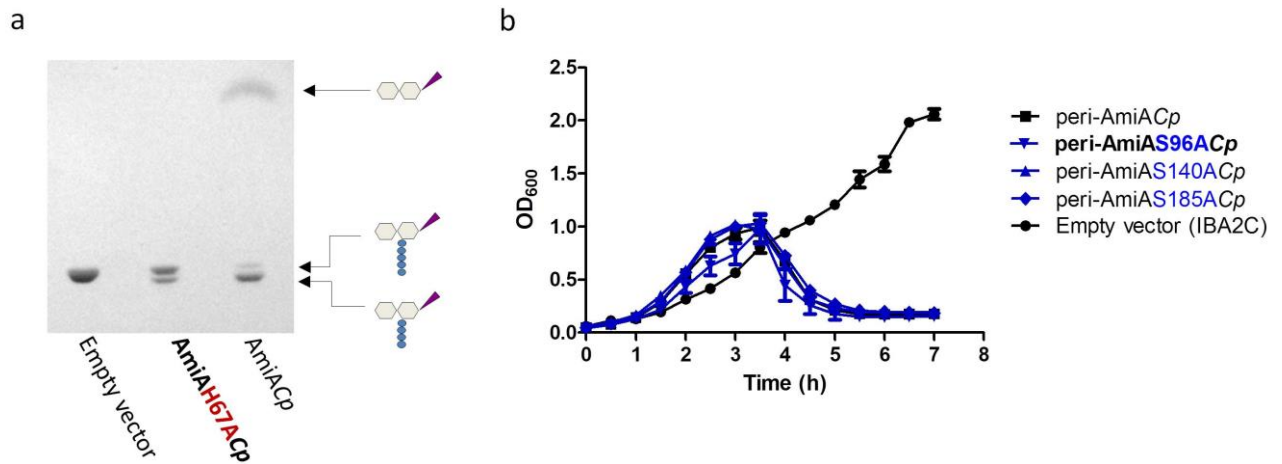

### Supplementary Figure 4

**Characterization of enzymatic activities of AmiACp mutant proteins.** Loss of amidase activity in the amidase active site mutant AmiAH67Acp did not affect DD-CPase activity (A). Conversely, amidase activity was not impaired in DD-CPase active site mutants (B). Error bars indicate  $\pm$  s.d. (n=3).

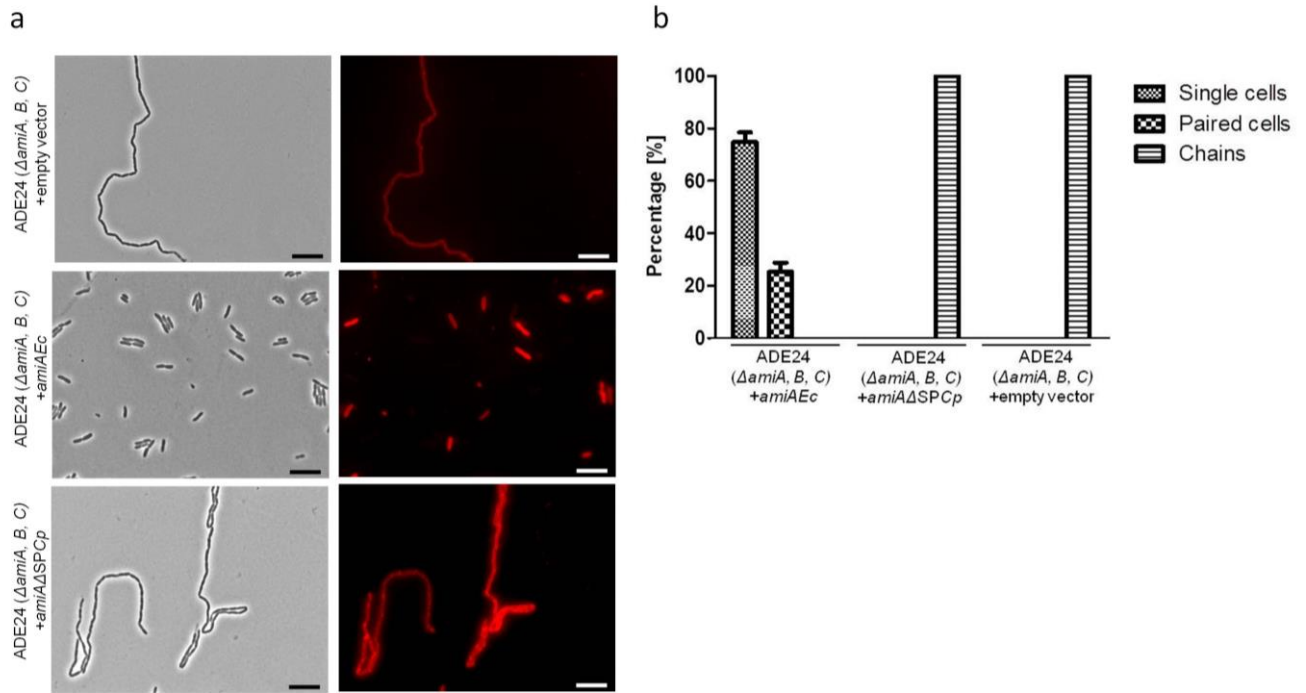

### Supplementary Figure 5

**Complementation experiments with *E. coli*  $\Delta\text{amiABC}$  triple knockout mutant ADE24, *AmiAEC* and *AmiA $\Delta$ SPCp*.** The mutant was transformed with plasmids that allow for AHT induced expression of *AmiAEC* and *AmiA $\Delta$ SPCp*, respectively; microscopy (a) and quantitative (b) analyses of the experiments: in the presence of glucose and AHT, expression of *AmiC* from *E. coli* was blocked and complementation of the chain forming triple amidase mutant by *AmiAEC* resulted in separated rod-shaped cells, whereas complementation with the *C. pneumoniae* homolog that lacked its native signalpeptide ( $\Delta\text{SP}$ ) failed. Error bars indicate  $\pm$  s.d. (n=3). Scale bar 10  $\mu\text{m}$ .

## Supplementary Tables

**Supplementary Table 1. Strains, plasmids and primers<sup>a</sup> used in this study**

| Strain, plasmid or primer | Description                                                                                                                                                                                             | Reference or source |
|---------------------------|---------------------------------------------------------------------------------------------------------------------------------------------------------------------------------------------------------|---------------------|
| <i>E. coli</i> JM 83      | Expression strain                                                                                                                                                                                       | DSM3947             |
| <i>E. coli</i> W3110      | Wild type, used as control for complementation assays                                                                                                                                                   | DSM5911             |
| <i>E. coli</i> ADE24      | $\Delta$ <i>amiA</i> , <i>amiB</i> , <i>amiC</i> amidase triple mutant, harboring pBAD33-amiCEc, glucose induced chain forming phenotype, used for complementation assays                               | This study          |
| pBAD33-amiCEc             | <i>amiC</i> from <i>E. coli</i> , chloramphenicol <sup>R</sup> , expression of <i>amiCEc</i> is blocked in the presence of glucose, used for complementation assay                                      | This study          |
| IBA2-amiACp*              | <i>amiA</i> from <i>C. pneumoniae</i> , the native N-terminal signal peptide is replaced by the OmpA leader peptide, C-terminal Strep-tag, used for periplasmic overproduction and growth kinetic assay | This study          |
| IBA3-amiACp               | <i>amiA</i> from <i>C. pneumoniae</i> , C-terminal Strep-tag, used for complementation and growth kinetic assays                                                                                        | This study          |
| IBA2-amiAEc               | <i>amiA</i> from <i>E. coli</i> , the native N-terminal signal peptide is replaced by the OmpA leader peptide, C-terminal Strep-tag, used for complementation                                           | This study          |
| IBA3-amiAEc               | <i>amiA</i> from <i>E. coli</i> , C-terminal Strep-tag, used for complementation                                                                                                                        | This study          |
| IBA2-amiAH67ACp           | <i>amiA</i> from <i>C. pneumoniae</i> , C-terminal His-tag, AmiA H67A mutant (AmiAH67ACp), used for active site studies                                                                                 | This study          |
| IBA2-amiAH136ACp          | <i>amiA</i> from <i>C. pneumoniae</i> , C-terminal His-tag, AmiA H67A mutant (AmiAH136ACp), used for active site studies                                                                                | This study          |
| IBA2-amiAE207ACp          | <i>amiA</i> from <i>C. pneumoniae</i> , C-terminal His-tag, AmiA H67A mutant (AmiAE207ACp), used for active site studies                                                                                | This study          |
| IBA2-amiAS96ACp           | <i>amiA</i> from <i>C. pneumoniae</i> , C-terminal His-tag, AmiA H67A mutant (AmiAS96ACp), used for active site studies                                                                                 | This study          |
| IBA2-amiAS140ACp          | <i>amiA</i> from <i>C. pneumoniae</i> , C-terminal His-tag, AmiA H67A mutant (AmiAS140ACp), used for active site studies                                                                                | This study          |
| IBA2-amiAS185ACp          | <i>amiA</i> from <i>C. pneumoniae</i> , C-terminal His-tag, AmiA H67A mutant (AmiAS185ACp), used for active site studies                                                                                | This study          |
| SacIamiCup                | TAGGAGCTCCAGATTATGCGTCTTTCGC                                                                                                                                                                            | This study          |
| HindIIIamiCdw             | GGCAAGCTTTTCAGCGCCTTTTATCATC                                                                                                                                                                            | This study          |
| amiA-SP Cp IBA2F          | ATGGTAGGTCTCAGGCCCAAACACCGAATCCTCCTCAGC                                                                                                                                                                 | This study          |
| amiA-SP Cp IBA3F          | ATGGTAGGTCTCAAATGCAAACACCGAATCCTCCTCAGC                                                                                                                                                                 | This study          |
| amiA Cp IBA2F             | ATGGTAGGTCTCAGGCCATGAAGCTTACCAAAATTTAAACACC                                                                                                                                                             | This study          |
| amiA Cp IBA3F             | ATGGTAGGTCTCAAATGATGAAGCTTACCAAAATTTAAACACC                                                                                                                                                             | This study          |
| amiA +/-SP Cp IBA2/3R     | ATGGTAGGTCTCAGCGCTATTTGCTTGTATCTGTGGTTTACGT                                                                                                                                                             | This study          |
| amiA-H67A-sense           | AGTGAGGTTATATTTATAGATCCTGGAGCCGGGGGAAAAGATCA                                                                                                                                                            | This study          |
| amiA-H67A-antisense       | TGATCTTTTCCCCCGGCTCCAGGATCTATAAATATAACCTCACT                                                                                                                                                            | This study          |
| amiA-H136A-sense          | GCGTTTGAAGAATGATTACAGGCGATGCTGATAAAGACATCCCC                                                                                                                                                            | This study          |
| amiA-H136A-antisense      | GGGGATGTCTTTATCAGCATCGCCTGTAATCATTCTTCAAACGC                                                                                                                                                            | This study          |
| amiA-E207A-sense          | GCCTGCAGTTTTGGTGGCAACCGGGTTTTATCCA                                                                                                                                                                      | This study          |
| amiA-E207A-antisense      | TGGATAAAAACCCGGTTGCCACCAAAACTGCAGGC                                                                                                                                                                     | This study          |
| amiA-S96A-sense           | CTCTTGCTTTGACGGTTCAAGCTTACTTAAAGCGGATGGGTT                                                                                                                                                              | This study          |
| amiA-S96A-antisense       | AACCCATCCGCTTTAAGTAAGCTTGAACCGTCAAAGCAAGAG                                                                                                                                                              | This study          |
| amiA-S140A-sense          | GGCTGCTGCGTTTGAAGCATGATTACAGTGGATGC                                                                                                                                                                     | This study          |
| amiA-S140A-antisense      | GCATCCACTGTAATCATGCTTCAAACGCAGCAGCC                                                                                                                                                                     | This study          |
| amiA-S185A-sense          | TCGCAGTTTTCAAACCTCGAGCCTTCAAAAATGCCATTTTTTTC                                                                                                                                                            | This study          |
| amiA-S185A-antisense      | GAAAAAATGGCATTTTGAAGGCTCGAGGTTTGAAAACCTGCGA                                                                                                                                                             | This study          |
| amiA Ec IBA2CF            | ATGGTAGGTCTCAGGCCATGAGCACTTTTAAACCACTAAAAAC                                                                                                                                                             | This study          |
| amiA Ec IBA2CR            | ATGGTAGGTCTCAGCGCTTCGCTTTTTCGAATGTGCTTTCTG                                                                                                                                                              | This study          |
| nlpD IBA2CF               | ATGGTAGGTCTCAGGCCATGAATCGTAGAGACATGGTAATAAC                                                                                                                                                             | This study          |
| nlpD IBA2CR               | ATGGTAGGTCTCAGCGCTACGTATGCGCAACTGATCTCCAG                                                                                                                                                               | This study          |

<sup>a</sup> in 5'-3' direction. \* For penicillin inhibition, bocillin FL binding and nitrocefin hydrolysis assays the Amp<sup>R</sup> resistance marker was exchanged with Cam<sup>R</sup> resistance marker to prevent potential contamination with TEM beta-lactamase.

## Supplementary Methods

### Detection of penicillin-binding proteins (PBPs) using bocillin FL

The detection of contaminating *E. coli* PBPs was performed with labeling assays using fluorescent penicillin bocillin FL as previously described with slight modifications<sup>3</sup>. 5  $\mu$ M of chlamydial AmiA (produced with expression vector IBA2-amiACp containing CamR resistance marker instead of AmpR to prevent a potential contamination with TEM beta-lactamase), a mock purification or bovine serum albumin (BSA) was incubated in a final volume of 20  $\mu$ l containing 50 mM MES, pH 5.5, 2 mM MgCl<sub>2</sub> and 25  $\mu$ M bocillin FL for 2 h. Then the sample received 5  $\mu$ l of SDS-sample buffer, was boiled for 5 min and chilled on ice for 10 min. 20  $\mu$ l of the sample were analyzed by SDS-PAGE. The bocillin-labeled proteins were detected by UV-transillumination.

### Detection of beta-lactamase activity

Beta-lactamase activity was tested in nitrocefin hydrolysis assays as described previously<sup>4</sup>.

The experiments were carried out in a final volume of 50  $\mu$ l containing 130  $\mu$ g of the protein and 100  $\mu$ M of the chromogenic cephalosporin nitrocefin.

## Supplementary References

1. Nerli B, Romanini D, Picó G (1997) Structural specificity requirements in the binding of beta lactam antibiotics to human serum albumin. *Chem. Biol. Interact.* **104**:179-202.
2. Sleep D, Cameron J, Evans LR (2013) Albumin as a versatile platform for drug half-life extension. *Biochim. Biophys. Acta.* **1830**:5526-34.
3. Zhao G, Meier TI, Kahl SD, Gee KR, Blaszcak LC (1999) BOCILLIN FL, a sensitive and commercially available reagent for detection of penicillin-binding proteins. *Antimicrob. Agents. Chemother.* **43**:1124-1128.
4. Uri JV (1985) Detection of beta-lactamase activity with nitrocefin of multiple strains of various microbial genera. *Acta. Microbiol. Hung.* **32**:133-45.
